# Supplementary material
Source: PubMed Central journal article supplement (PMC2230574)
Supplement: plntphys_pp.107.106468_3.pdf [file plntphys_pp.107.106468_3.pdf]

## SUPPLEMENTAL FIGURE LEGENDS

**Supplementary Figure S1.** Expression of *PKS1* in root gravitropism experiments. A. *PKS1* expression in the roots exposed to 0; 1 or 12 h bilateral red light followed by 12 h darkness before GUS staining. B. *PKS1* expression in seedlings exposed to 0, 1 or 12 h red light and placed horizontally in darkness for 12 h before GUS staining.

**Supplementary Figure S2.** Protein blot showing the failure of *pks1-1* and *pks1-2* mutants to accumulate PKS1. Experimental procedures as described earlier (Lariguet et al., 2003). DET3 antibody was used as loading control.
