# Supplementary material
Source: PubMed Central journal article supplement (PMC2230574)

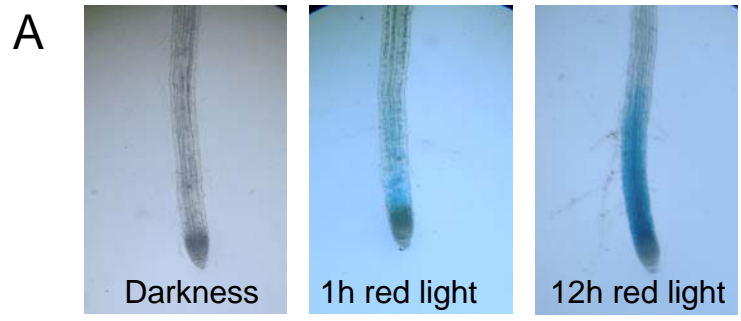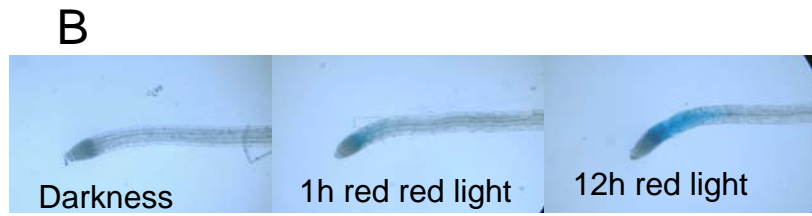

Supplementary Figure 1

Supplement: plntphys_pp.107.106468_1.pdf [file plntphys_pp.107.106468_1.pdf]

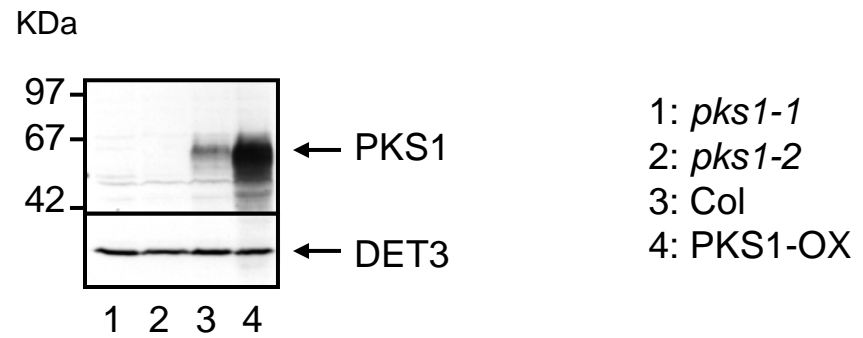

Supplementary Figure 2

Supplement: plntphys_pp.107.106468_2.pdf [file plntphys_pp.107.106468_2.pdf]
